## Correction: Amphiregulin enhances $\alpha6\beta1$ integrin expression and cell motility in human chondrosarcoma cells through Ras/Raf/MEK/ERK/AP-1 pathway

Jui-Chieh Chen, Yu-Ju Chen, Chih-Yang Lin, Yi-Chin Fong, Chin-Jung Hsu, Chun-Hao Tsai, Jen-Liang Su and Chih-Hsin Tang

Copyright: Chen et al. This is an open-access article distributed under the terms of the Creative Commons Attribution License (CC-BY), which permits unrestricted use, distribution, and reproduction in any medium, provided the original author and source are credited.

**Present:** Due to an error during figure assembly, Figure 4C mistakenly contains the same image as Figure 3D.

**Correct:** The proper Figure 4C is shown below. The authors sincerely apologize for this oversight. The conclusions of the paper remain unchanged.

Original article: Oncotarget. 2015; 6:11434-46. doi: 10.18632/oncotarget.3397

Figure 4C

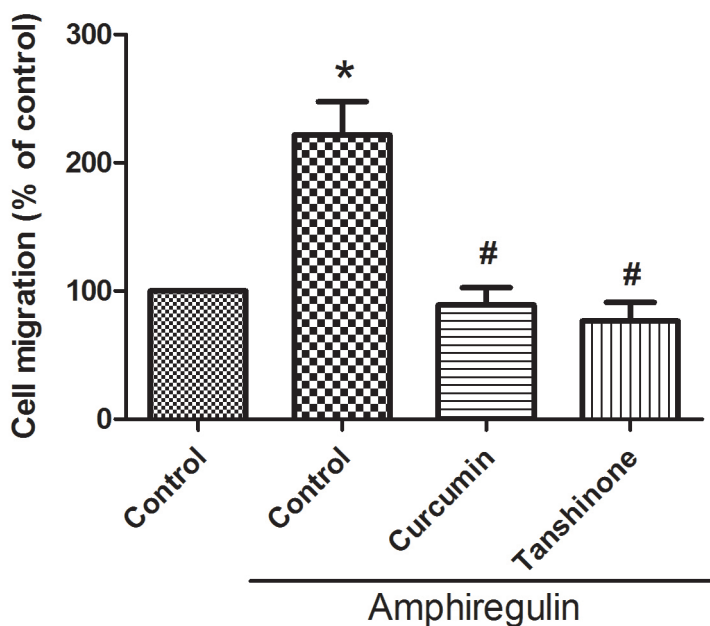

**Figure 4: Activation of c-Jun is required for AR-induced cell migration and up-regulation of integrin  $\alpha6\beta1$ .** C. Cells were pretreated with curcumin (10  $\mu$ M) or tanshinone (10  $\mu$ M) for 30 min followed by stimulation with AR (50 ng/ml) for 24 h. The *in vitro* migration was measured by Transwell assay. Results are expressed as mean  $\pm$  SEM. \* $P$  < 0.05 compared with control; # $P$  < 0.05 compared with AR-treated group.
